# Supplementary material for: Navigating uncertainties in RT-qPCR and plaque assay for infectivity assessment of norovirus
Source: Research Square preprint supplement (doi:10.21203/rs.3.rs-5477864/v1), 2025-02-18
Supplement: Supplementary file 1 [file TCID50_plaque assay.xlsx]

## Sheet: tcid50 raw data
dil	rep	logpfuml	logTCID50ml
0	1	6.7	5.4677
0	2	6.7	5.90103
0	3	6.7	6.05103
-1	1	5.7	4.98285
-1	2	5.7	4.80103
-1	3	5.7	4.92603
-2	1	4.7	3.80103
-2	2	4.7	4.13436
-2	3	4.7	3.92603
-3	1	3.7	2.92603
-3	2	3.7	2.80103
-3	3	3.7	2.98285
-4	1	2.7	2.46797
-4	2	2.7	2.46797
-4	3	2.7	1.98285
-5	1	1.7	1.4677
-5	2	1.7	1.4677
-5	3	1.7	1.67603
-6	1	0.7	1.4677
-6	2	0.7	1.4677
-6	3	0.7	1.4677
