# Supplementary material for: Navigating uncertainties in RT-qPCR and plaque assay for infectivity assessment of norovirus
Source: Research Square preprint supplement (doi:10.21203/rs.3.rs-5477864/v1), 2025-02-18
Supplement: Supplementary file 5 [file pfu_ct_022124.xlsx]

## Sheet: Sheet1
dil	rnase	ct	pfu_rxn	rep
0	w	NA	4.8	1
0	w	16.4166	4.8	1
0	wo	16.4593	4.8	1
0	wo	16.2464	4.8	1
1	w	21.1931	3.8	1
1	w	20.8317	3.8	1
1	wo	19.5956	3.8	1
1	wo	19.5899	3.8	1
2	w	23.5502	2.8	1
2	w	23.4102	2.8	1
2	wo	NA	2.8	1
2	wo	23.1365	2.8	1
3	w	27.2521	1.8	1
3	w	27.4185	1.8	1
3	wo	27.0852	1.8	1
3	wo	28.0102	1.8	1
4	w	32.1713	0.8	1
4	w	31.4498	0.8	1
4	wo	31.3247	0.8	1
4	wo	31.5096	0.8	1
5	w	34.2925	-0.2	1
5	w	34.1384	-0.2	1
5	wo	34.7492	-0.2	1
5	wo	34.0855	-0.2	1
6	w	41.2656	-1.2	1
6	w	39.1218	-1.2	1
6	wo	37.6611	-1.2	1
6	wo	39.7323	-1.2	1
0	w	17.0775	4.8	2
0	w	18.876	4.8	2
0	wo	NA	4.8	2
0	wo	15.6219	4.8	2
1	w	19.6174	3.8	2
1	w	19.5798	3.8	2
1	wo	19.0067	3.8	2
1	wo	19.3099	3.8	2
2	w	23.2256	2.8	2
2	w	23.2559	2.8	2
2	wo	22.6387	2.8	2
2	wo	23.0144	2.8	2
3	w	28.6503	1.8	2
3	w	28.4615	1.8	2
3	wo	26.1335	1.8	2
3	wo	27.1032	1.8	2
4	w	30.608	0.8	2
4	w	31.0596	0.8	2
4	wo	29.0248	0.8	2
4	wo	28.9524	0.8	2
5	w	35.4324	-0.2	2
5	w	33.9083	-0.2	2
5	wo	33.0336	-0.2	2
5	wo	34.8366	-0.2	2
6	w	39.1438	-1.2	2
6	w	37.237	-1.2	2
6	wo	37.0624	-1.2	2
6	wo	35.6706	-1.2	2
0	w	16.0213	4.8	3
0	w	NA	4.8	3
0	wo	14.9253	4.8	3
0	wo	15.1353	4.8	3
1	w	19.9194	3.8	3
1	w	19.8274	3.8	3
1	wo	20.0972	3.8	3
1	wo	19.4528	3.8	3
2	w	23.1394	2.8	3
2	w	23.7037	2.8	3
2	wo	22.4657	2.8	3
2	wo	22.184	2.8	3
3	w	27.2502	1.8	3
3	w	27.3404	1.8	3
3	wo	25.6488	1.8	3
3	wo	NA	1.8	3
4	w	30.219	0.8	3
4	w	29.7112	0.8	3
4	wo	NA	0.8	3
4	wo	30.2512	0.8	3
5	w	33.9977	-0.2	3
5	w	33.6323	-0.2	3
5	wo	33.4994	-0.2	3
5	wo	32.2129	-0.2	3
6	w	36.6909	-1.2	3
6	w	37.9555	-1.2	3
6	wo	35.6765	-1.2	3
6	wo	35.5891	-1.2	3
