# Supplementary material for: Navigating uncertainties in RT-qPCR and plaque assay for infectivity assessment of norovirus
Source: Research Square preprint supplement (doi:10.21203/rs.3.rs-5477864/v1), 2025-02-18
Supplement: Supplementary file 9 [file tv_std_curve.xlsx]

## Sheet: Sheet1
rep	dil	gc_rxn	log_gc_rxn	ct
5	-3	222600000	8.34753	16.0867
5	-3	222600000	8.34753	16.4737
5	-3	222600000	8.34753	16.1242
7	-3	222600000	8.34753	16.4471
7	-3	222600000	8.34753	17.5568
7	-3	222600000	8.34753	16.8146
8	-3	222600000	8.34753	16.6832
8	-3	222600000	8.34753	15.9178
8	-3	222600000	8.34753	17.2834
5	-4	22260000	7.34753	19.9628
5	-4	22260000	7.34753	20.1833
5	-4	22260000	7.34753	20.1115
7	-4	22260000	7.34753	20.0396
7	-4	22260000	7.34753	20.4191
7	-4	22260000	7.34753	20.0445
8	-4	22260000	7.34753	21.2121
8	-4	22260000	7.34753	20.5074
8	-4	22260000	7.34753	20.7273
5	-5	2226000	6.34753	24.5956
5	-5	2226000	6.34753	24.3896
5	-5	2226000	6.34753	23.5075
7	-5	2226000	6.34753	24.0974
7	-5	2226000	6.34753	23.2985
7	-5	2226000	6.34753	24.312
8	-5	2226000	6.34753	24.7179
8	-5	2226000	6.34753	24.6596
8	-5	2226000	6.34753	23.8095
5	-6	222600	5.34753	27.4564
5	-6	222600	5.34753	27.0359
5	-6	222600	5.34753	26.8711
7	-6	222600	5.34753	27.9411
7	-6	222600	5.34753	28.4209
7	-6	222600	5.34753	29.0185
8	-6	222600	5.34753	28.0727
8	-6	222600	5.34753	28.2846
8	-6	222600	5.34753	28.178
5	-7	22260	4.34753	31.8212
5	-7	22260	4.34753	31.3817
5	-7	22260	4.34753	31.714
7	-7	22260	4.34753	31.0254
7	-7	22260	4.34753	31.254
7	-7	22260	4.34753	32.1088
8	-7	22260	4.34753	32.0729
8	-7	22260	4.34753	32.0596
8	-7	22260	4.34753	31.854
5	-8	2226	3.34753	34.645
5	-8	2226	3.34753	36.5382
5	-8	2226	3.34753	36.3402
7	-8	2226	3.34753	35.5777
7	-8	2226	3.34753	35.7625
7	-8	2226	3.34753	35.2748
8	-8	2226	3.34753	36.0009
8	-8	2226	3.34753	35.1913
8	-8	2226	3.34753	35.9526
5	-9	222.6	2.34753	NA
5	-9	222.6	2.34753	NA
5	-9	222.6	2.34753	39.7456
7	-9	222.6	2.34753	NA
7	-9	222.6	2.34753	41.5325
7	-9	222.6	2.34753	39.2164
8	-9	222.6	2.34753	NA
8	-9	222.6	2.34753	NA
8	-9	222.6	2.34753	NA
